# Supplementary material for: Real-world Chinese herbal medicine for Parkinson's disease: a hospital-based retrospective analysis of electronic medical records
Source: PubMed Central journal article supplement (PMC11096516; doi:10.3389/fnagi.2024.1362948), 2024-05-02
Supplement: Data_Sheet_1.pdf [file Data_Sheet_1.pdf]

Supplementary file 1: Studies reporting beneficial effects of Chinese herbal medicine for Parkinson's disease

| Study type            | Participants                                                                   | Interventions                         | Control      | Improvements in domains of assessments |                    |                     |                 |
|-----------------------|--------------------------------------------------------------------------------|---------------------------------------|--------------|----------------------------------------|--------------------|---------------------|-----------------|
|                       |                                                                                |                                       |              | Motor symptom                          | Non motor symptoms | Motor complications | Quality of life |
| RCT (1)               | PD patients (n = 292)                                                          | <i>Pingchan</i> granule + WM          | Placebo + WM | Yes                                    | Yes                | NM                  | Yes             |
| RCT (2)               | PD patients with Chinese medicine syndrome of Shen essence deficiency (n = 86) | <i>Congrong Shujing</i> granules + WM | Placebo + WM | Yes                                    | NM                 | NM                  | Yes             |
| RCT (3)               | PD patients (n = 120)                                                          | <i>Bushen Huoxue</i> Granule + WM     | Placebo + WM | NM                                     | NM                 | NM                  | Yes             |
| RCT (4)               | PD patients with sleep disorders (n = 107)                                     | <i>Huatan Jieyu</i> granules + WM     | WM           | NM                                     | NM                 | Yes                 | Not mentioned   |
| Systematic review (5) | PD patients from thirteen RCTs (n = 843)                                       | CHM + WM                              | Placebo + WM | Yes                                    | Yes                | NM                  | Yes             |

Note: CHM: Chinese herbal medicine; n= number; NM: not mentioned; PD: Parkinson's disease; RCT: randomised controlled trial; WM: western medicine.

References for Supplementary file 1:

1. Gu SC, Shi R, Gaoag C, Yuan XL, Wu Y, Zhang Y, et al. Traditional Chinese medicine Pingchan granule for motor symptoms and functions in Parkinson's disease: A multicenter, randomized, double-blind, placebo-controlled study. *Phytomedicine*. 2023;108:154497.
2. Chen SY, Xiao SJ, Lin YN, Li XY, Xu Q, Yang SS, et al. Clinical Efficacy and Transcriptomic Analysis of Congrong Shujing Granules ( ) in Patients with Parkinson's Disease and Syndrome of Shen (Kidney) Essence Deficiency. *Chin J Integr Med*. 2020;26(6):412-9.
3. Li M, Yang HM, Luo DX, Chen JZ, Shi HJ. Multi-dimensional analysis on Parkinson's disease questionnaire-39 in Parkinson's patients treated with Bushen Huoxue Granule: A multicenter, randomized, double-blinded and placebo controlled trial. *Complement Ther Med*. 2016;29:116-20.
4. Liu M, Hu C, Zhang Y, Li Q, Zhang Q, Fang Y, et al. Effect of Huatan Jieyu granules in treatment of Parkinson's disease patients with sleep disorder identified as symptom pattern of phlegma-heat-stirring wind. *J Tradit Chin Med*. 2020;40(3):461-6.
5. Jun P, Zhao H, Jung IC, Kwon O, Han CH, Won J, Jang JH. Efficacy of herbal medicine treatment based on syndrome differentiation for Parkinson's disease: A systematic review and meta-analysis of randomized placebo-controlled clinical trials. *Front Pharmacol*. 2023;14:1108407.
