# Supplementary material for: Real-world Chinese herbal medicine for Parkinson's disease: a hospital-based retrospective analysis of electronic medical records
Source: PubMed Central journal article supplement (PMC11096516; doi:10.3389/fnagi.2024.1362948), 2024-05-02
Supplement: Data_Sheet_2.pdf [file Data_Sheet_2.pdf]

Supplementary file 2 Potential mechanisms of frequent herbs for Parkinson's disease and associated non-motor symptoms

| Herb            | Scientific names                                                                                                   | Preparation                                                                               | Chemical constituents                                                                                           | Subject                                       | Administration        | Bioactivity                                     | Mechanism of action                                                                                                                  |
|-----------------|--------------------------------------------------------------------------------------------------------------------|-------------------------------------------------------------------------------------------|-----------------------------------------------------------------------------------------------------------------|-----------------------------------------------|-----------------------|-------------------------------------------------|--------------------------------------------------------------------------------------------------------------------------------------|
| <i>Gan cao</i>  | 1. <i>Glycyrrhiza uralensis</i> Fisch.<br>2. <i>Glycyrrhiza inflata</i> Batalin<br>3. <i>Glycyrrhiza glabra</i> L. | Extracts (water)                                                                          | Glabridin (specific for G. Glabra), glycyrrhizic acid, liquiritin, liquitinapioside, and licoricesaponin-G2     | IMR32 cell                                    | In-vitro              | Neuroprotective effect                          | Preventing rotenone-induced toxicity via regulating ERK-1/2 pathways (1).                                                            |
|                 |                                                                                                                    | Extracts (water)                                                                          | Glabridin (specific for G. Glabra), glycyrrhizic acid, liquiritin, liquitinapioside, and licoricesaponin-G2     | IMR32 cell                                    | In-vitro              | Neuroprotective effect                          | Preventing the dysregulation of the citric acid cycle by rotenone-induced energetic stress via regulating the mtorc1-AMPK1 axis (2). |
|                 |                                                                                                                    | Extracts (water)                                                                          | Phenolic acids and their derivatives (vanillic acid, 5-caffeoylquinic acid, syringic acid, and p-coumaric acid) | Cell                                          | In-vitro              | Inhibiting MAO-B                                | Excreting the most potent MAO-B inhibitory action (3).                                                                               |
|                 |                                                                                                                    | Compounds                                                                                 | Licopyranocoumarin and glycyrurol                                                                               | PC12D cell                                    | In vitro              | Neuroprotective effect                          | Suppressing reactive oxygen species generation, thereby inhibiting MPP <sup>+</sup> -induced neuronal PC12D cell death (4).          |
|                 |                                                                                                                    | Compound                                                                                  | Isoliquiritigenin                                                                                               | Dopaminergic cell line                        | In vitro              | Neuroprotective effect                          | Protecting dopaminergic cell under oxidative stress conditions by regulating the apoptotic process (5).                              |
|                 |                                                                                                                    | Extracts (water, in combination with <i>Vicia faba</i> and <i>Uncaria rhynchophylla</i> ) | Phenolic compounds, namely, gallic acid, catechin, epicatechin, and resveratrol                                 | Hypoe22 cell, Striatum specimens from SD rats | In-vitro, Ex vivo     | Antioxidant effects and neuroprotective effects | Contrasting the upregulated lactate dehydrogenase and nitrite levels and in reducing striatal dopamine turnover (6)                  |
| <i>Huang qi</i> | <i>Astragalus mongholicus</i>                                                                                      | Compound                                                                                  | Astragaloside IV                                                                                                | Long culture-induced                          | In vivo and in vitro, | Preventing dopaminergic                         | Inhibiting of astrocyte senescence through promoting mitophagy (7).                                                                  |

|          |                           |                                                                                                              |                                     |                                                             |                                                                                                                                                                                |
|----------|---------------------------|--------------------------------------------------------------------------------------------------------------|-------------------------------------|-------------------------------------------------------------|--------------------------------------------------------------------------------------------------------------------------------------------------------------------------------|
| Bunge    |                           | replicative senescence model and LPS/MPP+-induced premature senescence model and MPTP-induced PD mouse model | intraperitoneal injection           | neurodegeneration in PD                                     |                                                                                                                                                                                |
| Compound | Astragaloside IV          | MPTP-induced PD mouse model, LPS-induced BV2 microglia cell                                                  | In vivo and in vitro, oral gavage   | Anti-inflammatory, antioxidant, and neuroprotective effects | Protecting dopaminergic neuron from neuroinflammation and oxidative stress via activating the Nrf2 pathways and suppressing nfkb/NLRP3 inflammasome signalling pathway (8).    |
| Compound | Astragaloside IV          | 6-OHDA-treated SH-SY5Y cell                                                                                  | In vitro                            | Anti-inflammatory, antioxidant, and neuroprotective effects | Enhancing the cell viability, and inhibiting apoptosis, inflammation and oxidative stress of 6-OHDA-treated SH-SY5Y cell via activating the JAK2/STAT3 signalling pathway (9). |
| Compound | Astragaloside IV          | 6-OHDA treated nigral cell cultures                                                                          | In vitro                            | Neuroprotective and neurosprouting effects                  | Protecting dopaminergic neurons against 6-OHDA-induced degeneration, promoting neurite outgrowth and increased TH and NOS immunoreactive of dopaminergic neurons (10).         |
| Compound | Astragaloside IV          | H <sub>2</sub> O <sub>2</sub> -exposed SH-SY5Y cell                                                          | In vitro                            | Neuroprotective effect                                      | Inhibiting the expression of the $\alpha$ -synuclein via the p38 MAPK signalling pathway (11).                                                                                 |
| Compound | Astragalus polysaccharide | 6-OHDA-treated PC12 cell                                                                                     | In vitro                            | Anti-Parkinson effect                                       | Increasing autophagy via inhibiting PI3K protein to activate PI3K/AKT/mtor pathway (12)                                                                                        |
| Compound | Calycosin                 | MPTP-induced PD mouse model,                                                                                 | Intracerebroventricularly injection | Anti-parkinsonism and anti-                                 | Mitigating PD symptoms through TLR/NF- $\kappa$ b and MAPK pathways in mice and cell lines (13)                                                                                |

|                 |                                         |                    |                                                          |                                                                 |                                                      |                                               |                                                                                                                                                                                                                                                                                     |
|-----------------|-----------------------------------------|--------------------|----------------------------------------------------------|-----------------------------------------------------------------|------------------------------------------------------|-----------------------------------------------|-------------------------------------------------------------------------------------------------------------------------------------------------------------------------------------------------------------------------------------------------------------------------------------|
|                 |                                         |                    |                                                          | LPS-induced BV2 microglia cell                                  |                                                      | neuroinflammatory effects                     |                                                                                                                                                                                                                                                                                     |
| <i>Bai zhu</i>  | <i>Atractylodes macrocephala</i> Koidz. | Compound           | Atractylenolide-I                                        | LPS-stimulated BV-2 cell, MPTP-intoxicated C57BL6/J mouse model | In vivo and in vitro, Intraperitoneal administration | Anti-neuroinflammatory                        | Abating the nuclear translocation of NF- $\kappa$ b and by inducing HO-1 (in vitro). Reversing MPTP-induced behavioural deficits, decreasing microglial activation, and conferring protection to dopaminergic neurons (in vivo) (14).                                               |
|                 |                                         | Compound           | Atractylenolide-I                                        | MPP <sup>+</sup> -induced cytotoxicity in SH-SY5Y cell          | In vitro                                             | Anti-apoptosis and antioxidant effects        | Reducing pro-apoptotic signals and also by induction of antioxidant protein (15).                                                                                                                                                                                                   |
|                 |                                         | Compound           | Atractylon                                               | MPTP-induced PD mouse model, SY-SY5Y cell                       | In vivo and in vitro, oral administration            | Anti-Parkinson effect                         | Activating DRD2, attenuating motor deficits and gait disorders, and protecting dopaminergic neurons in MPTP-induced PD mice (16).                                                                                                                                                   |
|                 |                                         | Extracts (ethanol) | Atractylenolide I, atractylenolide III, and atractylodin | LPS-stimulated microglial BV2 cell                              | In vitro                                             | Anti-neuroinflammatory                        | Attenuating the production of NO and inflammatory cytokines induced by LPS, also inhibiting the expression of inos and COX-2 without causing cytotoxicity, attenuating the transcriptional activities of NF- $\kappa$ b and MAPK phosphorylation, and induced HO-1 expression (17). |
| <i>Dang gui</i> | <i>Angelica sinensis</i> (Oliv.) Diels  | Compound           | <i>N</i> -Butylidenephthalide                            | MPTP-induced PD mouse model, adipose-derived stem cell          | In vitro                                             | Anti-inflammatory and neuroprotective effects | Stimulating adipose-derived stem cell with <i>n</i> -Butylidenephthalide improved PD recovery efficiency (18).                                                                                                                                                                      |
|                 |                                         | Compound           | <i>N</i> -Butylidenephthalide                            | <i>Caenorhabditis elegans</i> PD model                          | Mixed with the OP50/NGM plates for animal incubation | Antiparkinsonian activities                   | Blocking egl-1 expression to inhibit apoptosis pathways and by raising rpn-6 expression to enhance the activity of proteasomes (19).                                                                                                                                                |
| <i>Di huang</i> | <i>Rehmannia glutinosa</i>              | Compound           | Catalpol                                                 | H <sub>2</sub> O <sub>2</sub> -injured astrocytes               | In vitro                                             | Antioxidant and neuroprotective               | Increasing the cell viability and reducing the intracellular ROS                                                                                                                                                                                                                    |

|                                                    |                                                                                                                                                                                                   |                                                                                      |                                          |                          |                                                            |                                                                                                                                                                                                                                                                      |                                                  |
|----------------------------------------------------|---------------------------------------------------------------------------------------------------------------------------------------------------------------------------------------------------|--------------------------------------------------------------------------------------|------------------------------------------|--------------------------|------------------------------------------------------------|----------------------------------------------------------------------------------------------------------------------------------------------------------------------------------------------------------------------------------------------------------------------|--------------------------------------------------|
|                                                    | (Gaertn.) DC.                                                                                                                                                                                     |                                                                                      |                                          |                          | effects                                                    | formation; attenuating H <sub>2</sub> O <sub>2</sub> -induced oxidative stress via preventing the decrease in the activities of antioxidant enzymes in glutathione redox cycling such as glutathione peroxidase, glutathione reductase and glutathione content (20). |                                                  |
| Compound                                           | Catalpol                                                                                                                                                                                          | LPS-induced microglia                                                                | In vitro                                 |                          | Antioxidant, anti-inflammatory and neuroprotective effects | Inhibiting microglial activation and reducing the production of proinflammatory factors (21).                                                                                                                                                                        |                                                  |
| Compound                                           | Catalpol                                                                                                                                                                                          | MPTP-induced astrocytes                                                              | In vitro                                 |                          | Neuroprotective effect                                     | Attenuating mitochondrial dysfunction and MAO-B activity (22).                                                                                                                                                                                                       |                                                  |
| Compound (Dihuang Granule)                         | <i>Quercetin, kaempferol, luteolin, tanshinone IIA, yohimbine, salviolone, beta-sitosterol, 4-methylenemiltirone, dihydrotanshinlactone, and 2-isopropyl-8-methylphenanthrene-3,4-dione, etc.</i> | 6-OHDA-induced PD rat model                                                          | Intragastric administration              |                          | Anti-Parkinson therapeutic effect                          | Modulating apoptosis through MAPK signalling (23).                                                                                                                                                                                                                   |                                                  |
| Compound (Dihuang Granule)                         | N/A                                                                                                                                                                                               | MPTP-induced PD mouse model                                                          | Oral administration                      |                          | Improving gut microbial in PD                              | Blocking the pathway of TLR4/NF- $\kappa$ b (24).                                                                                                                                                                                                                    |                                                  |
| Extract (water, in formula <i>Liuwei dihuang</i> ) | 5-hydroxymethyl-2-furaldehyde, morroniside, loganin, paeoniflorin, verbascoside and paeonol                                                                                                       | MPTP-induced PD mouse model, MPP <sup>+</sup> -treated primary mesencephalic neurons | In vitro, Intraperitoneal administration |                          | Dopaminergic neurons protection effects                    | Protecting dopaminergic neurons through enhancing antioxidant defense and decreasing apoptotic death (25).                                                                                                                                                           |                                                  |
| <i>Bai shao</i>                                    | <i>Paeonia lactiflora</i> Pall.                                                                                                                                                                   | Compounds                                                                            | Total Glucosides                         | MPTP-induced mouse model | Intragastric administration                                | Neuroprotective effect                                                                                                                                                                                                                                               | Regulating LRRK2/alpha-synuclein signalling      |
|                                                    |                                                                                                                                                                                                   | Compound                                                                             | Paeoniflorin                             | MPTP-induced             | Intragastric                                               | Neuroprotective                                                                                                                                                                                                                                                      | Regulating the $\alpha$ -synuclein/PKC- $\delta$ |

|                                    |                                                                                 |                                                                              |                                                |                                                                                     |                                              |                                                                                               |                                                                                                                           |
|------------------------------------|---------------------------------------------------------------------------------|------------------------------------------------------------------------------|------------------------------------------------|-------------------------------------------------------------------------------------|----------------------------------------------|-----------------------------------------------------------------------------------------------|---------------------------------------------------------------------------------------------------------------------------|
|                                    |                                                                                 |                                                                              | PD mouse model                                 | administration                                                                      | effect                                       | signalling pathway to reduce neuronal apoptosis (26).                                         |                                                                                                                           |
| Compound                           | Paeoniflorin                                                                    |                                                                              | MPP <sup>+</sup> -induced PC12 cell            | In vitro                                                                            | Neuroprotective effect                       | Regulating mitochondrial membrane potential and Bcl-2/Bax/caspase-3 signalling pathways (27). |                                                                                                                           |
| Compound                           | Paeoniflorin                                                                    |                                                                              | MPP <sup>+</sup> -induced dopaminergic neurons | In vitro                                                                            | Neuroprotective and anti-ferroptosis effects | Preventing ferroptosis via activation of the Akt/Nrf2/Gpx4 pathway in vitro (28).             |                                                                                                                           |
| Compound                           | Paeoniflorin                                                                    |                                                                              | MPTP-induced PD mouse model                    | Subcutaneous administration                                                         | Anti-neuroinflammatory effect                | Inhibiting neuroinflammation by activation of the adenosine A1 receptor (29).                 |                                                                                                                           |
| Compound                           | Paeoniflorin                                                                    |                                                                              | 6-OHDA-induced PC12 cell                       | In vitro                                                                            | Antioxidant and anti-apoptosis effects       | Inhibiting reactive oxygen species (ROS)/p38/JNK/NF- $\kappa$ B signalling pathway (30).      |                                                                                                                           |
| Compound                           | Paeoniflorin                                                                    |                                                                              | Glutamate induced PC12 cell                    | In vitro                                                                            | Neuroprotective effect                       | Mitochondrial membrane potential and Bcl-2/ Bax signal pathway (31).                          |                                                                                                                           |
| Extract (aqueous ethanol fraction) | Total glucosides of paeony, including paeoniflorin and albiflorin               |                                                                              | MPTP-induced PD mouse model                    | Intragastric administration                                                         | Neuroprotective effect                       | Regulating the camp/PKA/CREB signalling pathway (32)                                          |                                                                                                                           |
| Chai hu                            | 1. <i>Bupleurum chinense</i> DC.<br>2. <i>Bupleurum scorzonerifolium</i> Willd. | Extracts (ethanol, with <i>Moutan</i> cortex, <i>Angelica Dahurica</i> root) | N/A                                            | MPP <sup>+</sup> -treated SH-SY5Y cell, MPTP-induced PD mouse model                 | Oral administration, In vitro                | Neuroprotective effect                                                                        | Alleviating mitochondria damage in experimental models of PD (33).<br>Regulating nuclear receptor-related 1 protein (34). |
|                                    |                                                                                 | Extracts (ethanol)                                                           | Saikosaponin (C, A B3 and B4)                  | LPS-stimulated microglial cell and LPS-intraperitoneal injected C57BL/6 mouse model | In vitro, oral administration                | Anti-inflammatory effect                                                                      | Suppressing NF- $\kappa$ B-mediated inflammatory pathways (35).                                                           |
| Zhi                                | <i>Citrus aurantium</i>                                                         | Extracts                                                                     | Naringin, hesperidin,                          | Multistress-                                                                        | Oral                                         | Prokinetic effect                                                                             | Reducing gastric residual rate and                                                                                        |

|                             |                                 |                                                                                                |                                                    |                                                           |                                                      |                                              |                                                                                                       |
|-----------------------------|---------------------------------|------------------------------------------------------------------------------------------------|----------------------------------------------------|-----------------------------------------------------------|------------------------------------------------------|----------------------------------------------|-------------------------------------------------------------------------------------------------------|
| <i>qiao/Zhi shi/Chen pi</i> | L.                              | (water, in combination with <i>Citrus reticulata</i> Blanco and <i>Bupleurum chinense</i> DC.) | neohesperidin, saikosaponin a, and saikosaponin b2 | induced delayed gastric emptying mouse model              | administration, in vitro                             |                                              | increasing serum levels of 5-HT, MTL and SP (36).                                                     |
|                             |                                 | Extracts (water, in combination with <i>Rhizoma Atractylodis</i> )                             | N/A                                                | Loperamide-induced constipated rats                       | Oral administration                                  | Anti slow transit constipation               | Regulation the metabolism of caffeine and vitamin B6 (37).                                            |
| <i>Ren shen</i>             | <i>Panax ginseng</i> C. A. Mey. | Compound                                                                                       | Ginsenoside Re                                     | Rotenone-induced SH-SY5Y cell and <i>Drosophila</i> model | In vitro, flies administered                         | Neuroprotective effect                       | Inducing Nrf2/heme oxygenase-1 expression and activation of the dual PI3K/AKT and ERK pathways (38).  |
|                             |                                 | Compounds                                                                                      | Ginsenosides                                       | MPTP-induced PD mouse model                               | Oral administration                                  | Neuroprotective effect                       | Anti-apoptosis, antiinflammation, antioxidant, and maintenance of blood-brain barrier integrity (39). |
|                             |                                 | Compounds                                                                                      | Ginsenosides Rd and Re                             | Ccl4-induced primary dopaminergic cell                    | In vitro                                             | Neuroprotective effect                       | Lowering oxidative stress and anti-inflammation (40).                                                 |
|                             |                                 | Compound                                                                                       | Ginsenoside Rb1                                    | MPTP-induced PD mouse model                               | Administered intraperitoneally                       | Neuroprotective effect                       | Regulating prefrontal cortical gabaergic transmission (41).                                           |
|                             |                                 | Compound                                                                                       | Ginsenoside Rg1                                    | MPTP-induced PD mouse model                               | In vivo and in vitro, Intraperitoneal administration | Neuroprotective effect                       | Regulating the Wnt/ $\beta$ -catenin signalling pathway (42).                                         |
|                             |                                 | Compound                                                                                       | Ginsenoside Rg1                                    | MPTP-induced PD mouse model                               | Intraperitoneal administration                       | Immunomodulatory and neuroprotective effects | Regulating the peripheral and central inflammation (43).                                              |
|                             |                                 | Compound                                                                                       | Ginsenoside Rg1                                    | MPTP-induced PD mouse model                               | Intraperitoneal administration                       | Anti-Parkinson effect                        | Restoring motor functions to physiological level in MPTP-treated PD mice, and attenuating the         |

|                   |                              |                                  |                             |                                                                            |                                                                                                                                                                                                             |
|-------------------|------------------------------|----------------------------------|-----------------------------|----------------------------------------------------------------------------|-------------------------------------------------------------------------------------------------------------------------------------------------------------------------------------------------------------|
|                   |                              |                                  |                             |                                                                            | MPTP-induced loss of dopaminergic neurons in the substantia nigra and striatum (44).                                                                                                                        |
| Compound          | Ginsenoside Rg1              | MPTP-induced PD mouse model      | Oral administration         | Neuroprotective and anti-inflammatory effects                              | Reducing aberrant $\alpha$ -synuclein-mediated neuroinflammation (45).                                                                                                                                      |
| Compound          | Ginsenoside Rg1              | MPTP-induced PD mouse model      | Intraperitoneal injection   | Neuroprotective effect                                                     | Remitting the iron-regulated protein dyshomeostasis by ferritin and against lipid peroxidation stress in oligodendrocytes (46).                                                                             |
| Compound          | Ginsenoside Rg3              | Rotenone-induced PD mouse model  | Intragastric administration | Neuroprotective and antioxidant effects                                    | Regulating glutathione cysteine ligase modulatory subunit and glutathione cysteine ligase regulatory subunit expression (47).                                                                               |
| Extract           | Ginsenosides                 | BSSG-induced PD mouse model      | Oral administration         | Neuroprotective, anti-inflammatory, anti-apoptosis and antioxidant effects | Protecting against dopaminergic neurons in the substantia nigra. Reducing indices of inflammation, apoptosis and cell stress, preventing the accumulation of insoluble $\alpha$ -synuclein aggregates (48). |
| Extract (water)   | Ginsenosides Rg1, Re and Rb1 | SH-SY5Y human neuroblastoma cell | In vitro                    | Neuroprotective and anti-cytotoxicity effects                              | Suppressing ROS generation and inhibiting mitochondria-dependent apoptotic pathway (49).                                                                                                                    |
| Extract (water)   | Ginsenosides                 | MPTP-induced PD mouse model      | Oral administration         | Neuroprotective effect                                                     | Inhibiting MPTP-induced dopaminergic neuronal death and suppressing the cleavage of p35 to p25 in the substantia nigra and striatum (50).                                                                   |
| Extract (ethanol) | Gintonin                     | MPTP-induced PD mouse model      | Oral administration         | Anti-apoptosis, anti-inflammatory and antioxidant agent effects            | Activation of the nuclear factor erythroid 2-related factor 2 pathways and the inhibition of phosphorylation of the mitogen-activated protein kinases and nuclear factor-kappa B signalling pathways (51).  |
| Extracts          | Ginseng total protein        | Dm PINK <sub>1</sub>             | Oral                        | Neuroprotective                                                            | Protecting against mitochondrial                                                                                                                                                                            |

|                |                                 |                   |                        |                                                |                             |                                                                                         |                                                                                                                                                                                                                          |
|----------------|---------------------------------|-------------------|------------------------|------------------------------------------------|-----------------------------|-----------------------------------------------------------------------------------------|--------------------------------------------------------------------------------------------------------------------------------------------------------------------------------------------------------------------------|
|                |                                 |                   | model of PD            | administration                                 | effect                      | dysfunction and neurodegeneration by inducing uprmt in the Dm PINK1B9 model of PD (52). |                                                                                                                                                                                                                          |
|                |                                 | Extract (water)   | N/A                    | MPTP-induced PD mouse model                    | Oral administration         | Anti-Parkinson effect                                                                   | Preventing MPTP-induced leaky gut barrier, inflammation, and accumulation of asyn (53).                                                                                                                                  |
|                |                                 | Extract (water)   | N/A                    | MPTP-induced PD mouse model                    | Oral administration         | Anti-Parkinson effect                                                                   | Regulating neuronal formation and energy metabolism for survival (54).                                                                                                                                                   |
|                |                                 | Extract (water)   | N/A                    | MPP+-induced SH-SY5Y cell                      | In vitro                    | Anti- apoptosis and anti-mitophagy effect                                               | Regulating cytochrome c release from mitochondria and PINK1/parkin-mediated mitophagy, through regulation of the Bcl-2 family (55).                                                                                      |
|                |                                 | Extract (water)   | N/A                    | MPTP-induced mouse model                       | Oral administration         | Anti-Parkinson effect                                                                   | Suppressing dopaminergic neuronal death, augmenting the number of brdu- and brdu/double cortin (Dcx) and enhancing the expression of proliferation cell nuclear antigen, BDNF, GDNF, CDNF, CNTF, DRD3 and D5 mrnas (56). |
|                |                                 | Extract           | Pseudoginsenoside-f11  | 6-OHDA-induced PD rat model                    | Oral administration         | Anti-Parkinson effect                                                                   | Inhibiting free radical formation and stimulating endogenous antioxidant release (57).                                                                                                                                   |
| <i>Fu ling</i> | <i>Poria cocos</i> (Schw.) Wolf | Compound          | Acidic polysaccharides | CUMS rat model                                 | Intragastric administration | Antidepressant effect                                                                   | Regulating neurotransmitters and NLRP3 inflammasome signalling pathway (58).                                                                                                                                             |
|                |                                 | Compound          | Pachymic Acid          | Pentobarbital-induced sleep mouse model        | Intragastric administration | Sedative-hypnotic effect                                                                | Enhancing pentobarbital-induced sleeping behaviours via GABAergic mechanisms in rodents (59).                                                                                                                            |
|                |                                 | Compound          | Pachymic acid          | Cerebral ischemia/reperfusion injury rat model | Intragastric administration | Neuroprotective effect                                                                  | Activating PI3K / Akt signalling pathway(60).                                                                                                                                                                            |
|                |                                 | Extract (ethanol) | N/A                    | ACTH-induced sleep disturbed mouse model       | Intragastric administration | Sedative-hypnotic effect                                                                | Improving sleep quality under a normal sleep state through the GABA <sub>A</sub> receptor; promoting and improving sleep quality and sleep                                                                               |



|                            |                                                                                                                                      |                  |                                                                                                     |                                 |                                       |                                           |                                                                                                                                                                                                                                                                              |
|----------------------------|--------------------------------------------------------------------------------------------------------------------------------------|------------------|-----------------------------------------------------------------------------------------------------|---------------------------------|---------------------------------------|-------------------------------------------|------------------------------------------------------------------------------------------------------------------------------------------------------------------------------------------------------------------------------------------------------------------------------|
|                            |                                                                                                                                      | Extract (water)  | Polysaccharides                                                                                     | CUMS rat model                  | Intragastric administration           | Antidepressant-like effect                | structure in both the arousal activation state and stress- based sleep disturbance (61).<br>Regulating monoaminergic neurotransmission (DA, 5-HT) and inactivation of inflammation (p38, NF- $\kappa$ b and TNF- $\alpha$ ) (62).                                            |
| <i>Dang shen</i>           | 1. <i>Codonopsis pilosula</i> Nannf.<br>2. <i>Codonopsis pilosula</i> var. <i>Pilosula</i><br>3. <i>Campanumoea pilosula</i> Franch. | Compound         | Isorhapontigenin                                                                                    | PC12 cell                       | In vitro                              | Antioxidant effect                        | Enhanced the antioxidant effect induced by 1-Methyl-4-phenylpyridine in PC12 cell by suppressing the activation of the PI3K/Akt signaling pathway (63).                                                                                                                      |
| <i>Bu zhong yi qi tang</i> |                                                                                                                                      | Extracts (water) | ferulicacid, isoferulicacid, hesperidin, calycosin, glycyrrhizicacid, aposaponind, etc.             | Cerebral ischemia mouse model   | Intragastric administration           | Neuroprotective effect                    | Regulating intestinal microbiota and increasing the abundance of butyrate-producing Prevotellaceae_NK3B31_group and probiotic <i>Akkermansia</i> in mice 72h after surgery (64).                                                                                             |
|                            |                                                                                                                                      | Extracts (water) | Liquiritin apioside, Liquiritin, Nodakenin, Hesperidin, Glycyrrhizin, Decursin, Decursinol angelate | A $\beta$ -injected mouse model | In vitro, intragastric administration | anti-dementia and neuroprotective effects | Enhancing inhibition of A $\beta$ aggregation and BACE activity in vivo, as well as antioxidant activity in vitro, suppressing A $\beta$ aggregation and expression, as well as expression of A $\beta$ , NeuN, and BDNF in the hippocampi of A $\beta$ -injected mice (65). |

Note: A $\beta$ : amyloid- $\beta$ ; ACTH: adrenocorticotrophic hormone; aSyn: alpha-synuclein; BDNF: brain derived neurotrophic factor; BSSG:  $\beta$ -sitosterol  $\beta$ -d-glucoside; CCl<sub>4</sub>: Carbon tetrachloride; CDNF: cerebral dopamine neurotrophic factor; CNTF: ciliary neurotrophic factor; COX-2: cyclooxygenase; CUMS: chronic unpredictable mild stress; Dm: *Drosophila melanogaster*; GDNF: glial cell derived neurotrophic factor; DRD3: dopamine receptor D3; N/A: not available. H<sub>2</sub>O<sub>2</sub>: hydrogen peroxide; HO-1: heme oxygenase-1; iNOS: inducible nitric oxide synthase; SD: Sprague-Dawley; LPS/MPP<sup>+</sup>: lipopolysaccharide/1-methyl-4-phenylpyridinium; MAPK: mitogen-activated protein kinase; MPTP: 1-Methyl-4-phenyl-1,2,3,6-tetrahydropyridine; NF- $\kappa$ B: nuclear factor- $\kappa$ B; NO: nitric oxide; NOS: nitrite oxide synthase; PC12: pheochromocytoma cell; PD: Parkinson's disease; PINK<sub>1</sub>: PTEN-induced putative kinase 1; ROS: reactive oxygen specie; SH-SY5Y cell: SK-N-SH neuroblastoma cell line; TH: tyrosine hydrolase;

1. Karthikkeyan G, Prabhu A, Pervaje R, Pervaje SK, Modi PK, Prasad TSK. Data on dose-dependent cytotoxicity of rotenone and neuroprotection conferred by Yashtimadhu (*Glycyrrhiza glabra* L.) in an in vitro Parkinson's disease model. *Data Brief*. 2021;39:107535.
2. Karthikkeyan G, Behera SK, Upadhyay SS, Pervaje R, Prasad TSK, Modi PK. Metabolomics analysis highlights Yashtimadhu (*Glycyrrhiza glabra* L.)-mediated neuroprotection in a rotenone-induced cellular model of Parkinson's disease by restoring the mTORC1-AMPK1 axis in autophagic regulation. *Phytother Res*. 2022;36(5):2207-22.
3. Ramadan S, Sabry MM, Saad MA, Angeloni S, Sabry OM, Caprioli G, et al. Dismantling Parkinson's disease with herbs: MAO-B inhibitory activity and quantification of chemical constituents using HPLC-MS/MS of Egyptian local market plants. *Nat Prod Res*. 2022;36(22):5766-71.
4. Fujimaki T, Saiki S, Tashiro E, Yamada D, Kitagawa M, Hattori N, et al. Identification of licopyranocoumarin and glycyrurol from herbal medicines as neuroprotective compounds for Parkinson's disease. *PLoS One*. 2014;9(6):e100395.
5. Hwang CK, Chun HS. Isoliquiritigenin isolated from licorice *Glycyrrhiza uralensis* prevents 6-hydroxydopamine-induced apoptosis in dopaminergic neurons. *Biosci Biotechnol Biochem*. 2012;76(3):536-43.
6. Orlando G, Chiavaroli A, Leone S, Brunetti L, Politi M, Menghini L, et al. Inhibitory Effects Induced by *Vicia faba*, *Uncaria rhynchophylla*, and *Glycyrrhiza glabra* Water Extracts on Oxidative Stress Biomarkers and Dopamine Turnover in HypoE22 Cell and Isolated Rat Striatum Challenged with 6-Hydroxydopamine. *Antioxidants (Basel)*. 2019;8(12).
7. Xia ML, Xie XH, Ding JH, Du RH, Hu G. Astragaloside IV inhibits astrocyte senescence: implication in Parkinson's disease. *J Neuroinflammation*. 2020;17(1):105.
8. Yang C, Mo Y, Xu E, Wen H, Wei R, Li S, et al. Astragaloside IV ameliorates motor deficits and dopaminergic neuron degeneration via inhibiting neuroinflammation and oxidative stress in a Parkinson's disease mouse model. *Int Immunopharmacol*. 2019;75:105651.
9. Xu Z, Yang D, Huang X, Huang H. Astragaloside IV Protects 6-Hydroxydopamine-Induced SH-SY5Y Cell Model of Parkinson's Disease via Activating the JAK2/STAT3 Pathway. *Front Neurosci*. 2021;15:631501.
10. Chan WS, Durairajan SS, Lu JH, Wang Y, Xie LX, Kum WF, et al. Neuroprotective effects of Astragaloside IV in 6-hydroxydopamine-treated primary nigral cell culture. *Neurochem Int*. 2009;55(6):414-22.
11. Liu X, Zhang J, Wang S, Qiu J, Yu C. Astragaloside IV attenuates the H<sub>2</sub>O<sub>2</sub>-induced apoptosis of neuronal cell by inhibiting  $\alpha$ -synuclein expression via the p38 MAPK pathway. *Int J Mol Med*. 2017;40(6):1772-80.
12. Tan Y, Yin L, Sun Z, Shao S, Chen W, Man X, et al. Astragalus polysaccharide exerts anti-Parkinson via activating the PI3K/AKT/mTOR pathway to increase cellular autophagy level in vitro. *Int J Biol Macromol*. 2020;153:349-56.
13. Yang J, Jia M, Zhang X, Wang P. Calycosin attenuates MPTP-induced Parkinson's disease by suppressing the activation of TLR/NF- $\kappa$ B and MAPK pathways. *Phytother Res*. 2019;33(2):309-18.
14. More S, Choi DK. Neuroprotective Role of Atractylenolide-I in an In Vitro and In Vivo Model of Parkinson's Disease. *Nutrients*. 2017;9(5).
15. More SV, Choi DK. Atractylenolide-I Protects Human SH-SY5Y Cell from 1-Methyl-4-Phenylpyridinium-Induced Apoptotic Cell Death. *Int J Mol Sci*. 2017;18(5).
16. Li H, Wang F, Zhou Z, Jiang X, Li F, Feng Y, et al. Atractylon, a novel dopamine 2 receptor agonist, ameliorates Parkinsonian like motor dysfunctions in MPTP-induced mice. *NeuroToxicology*. 2022;89:121-6.

17. Jeong YH, Li W, Go Y, Oh YC. Atractylodis Rhizoma Alba Attenuates Neuroinflammation in BV2 Microglia upon LPS Stimulation by Inducing HO-1 Activity and Inhibiting NF- $\kappa$ B and MAPK. *Int J Mol Sci.* 2019;20(16).
18. Chi K, Fu RH, Huang YC, Chen SY, Hsu CJ, Lin SZ, et al. Adipose-derived Stem Cell Stimulated with n-Butylidenephthalide Exhibit Therapeutic Effects in a Mouse Model of Parkinson's Disease. *Cell Transplant.* 2018;27(3):456-70.
19. Fu RH, Harn HJ, Liu SP, Chen CS, Chang WL, Chen YM, et al. n-butylidenephthalide protects against dopaminergic neuron degeneration and  $\alpha$ -synuclein accumulation in *Caenorhabditis elegans* models of Parkinson's disease. *PLoS One.* 2014;9(1):e85305.
20. Bi J, Jiang B, Liu JH, Lei C, Zhang XL, An L-J. Protective effects of catalpol against H<sub>2</sub>O<sub>2</sub>-induced oxidative stress in astrocytes primary cultures. *Neuroscience Letters.* 2008;442(3):224-7.
21. Tian YY, An LJ, Jiang L, Duan YL, Chen J, Jiang B. Catalpol protects dopaminergic neurons from LPS-induced neurotoxicity in mesencephalic neuron-glia cultures. *Life Sci.* 2006;80(3):193-9.
22. Bi J, Wang XB, Chen L, Hao S, An LJ, Jiang B, et al. Catalpol protects mesencephalic neurons against MPTP induced neurotoxicity via attenuation of mitochondrial dysfunction and MAO-B activity. *Toxicol In Vitro.* 2008;22(8):1883-9.
23. Wang L, Yang YF, Chen L, He ZQ, Bi DY, Zhang L, et al. Compound Dihuang Granule Inhibits Nigrostriatal Pathway Apoptosis in Parkinson's Disease by Suppressing the JNK/AP-1 Pathway. *Front Pharmacol.* 2021;12:621359.
24. He ZQ, Huan PF, Wang L, He JC. Compound Dihuang Granule Changes Gut Microbiota of MPTP-Induced Parkinson's Disease Mice via Inhibiting TLR4/NF- $\kappa$ B Signaling. *Neurochem Res.* 2023;48(12):3610-24.
25. Tseng YT, Chang FR, Lo YC. The Chinese herbal formula Liuwei dihuang protects dopaminergic neurons against Parkinson's toxin through enhancing antioxidative defense and preventing apoptotic death. *Phytomedicine.* 2014;21(5):724-33.
26. Guo K, Zhang Y, Li L, Zhang J, Rong H, Liu D, et al. Neuroprotective effect of paeoniflorin in the mouse model of Parkinson's disease through  $\alpha$ -synuclein/protein kinase C  $\delta$  subtype signaling pathway. *Neuroreport.* 2021;32(17):1379-87.
27. Zheng M, Liu C, Fan Y, Shi D, Zhang Y. Protective Effects of Paeoniflorin Against MPP(+)-induced Neurotoxicity in PC12 Cell. *Neurochem Res.* 2016;41(6):1323-34.
28. Wang L, An H, Yu F, Yang J, Ding H, Bao Y, et al. The neuroprotective effects of paeoniflorin against MPP(+)-induced damage to dopaminergic neurons via the Akt/Nrf2/GPX4 pathway. *J Chem Neuroanat.* 2022;122:102103.
29. Liu HQ, Zhang WY, Luo XT, Ye Y, Zhu XZ. Paeoniflorin attenuates neuroinflammation and dopaminergic neurodegeneration in the MPTP model of Parkinson's disease by activation of adenosine A1 receptor. *Br J Pharmacol.* 2006;148(3):314-25.
30. Dong H, Li R, Yu C, Xu T, Zhang X, Dong M. Paeoniflorin inhibition of 6-hydroxydopamine-induced apoptosis in PC12 cell via suppressing reactive oxygen species-mediated PKC $\delta$ /NF- $\kappa$ B pathway. *Neuroscience.* 2015;285:70-80.
31. Sun R, Wang K, Wu D, Li X, Ou Y. Protective effect of paeoniflorin against glutamate-induced neurotoxicity in PC12 cell via Bcl-2/Bax signal pathway. *Folia Neuropathol.* 2012;50(3):270-6.
32. Zheng M, Liu C, Fan Y, Shi D, Jian W. Total glucosides of paeony (TGP) extracted from *Radix Paeoniae Alba* exerts neuroprotective effects in MPTP-induced experimental parkinsonism by regulating the cAMP/PKA/CREB signaling pathway. *J Ethnopharmacol.* 2019;245:112182.

33. Jeong JS, Piao Y, Kang S, Son M, Kang YC, Du XF, et al. Triple herbal extract DA-9805 exerts a neuroprotective effect via amelioration of mitochondrial damage in experimental models of Parkinson's disease. *Sci Rep.* 2018;8(1):15953.
34. Sim Y, Park G, Eo H, Huh E, Gu PS, Hong SP, et al. Protective effects of a herbal extract combination of *Bupleurum falcatum*, *Paeonia suffruticosa*, and *Angelica dahurica* against MPTP-induced neurotoxicity via regulation of nuclear receptor-related 1 protein. *Neuroscience.* 2017;340:166-75.
35. Park WH, Kang S, Piao Y, Pak CJ, Oh MS, Kim J, et al. Ethanol extract of *Bupleurum falcatum* and saikosaponins inhibit neuroinflammation via inhibition of NF- $\kappa$ B. *Journal of ethnopharmacology.* 2015;174:37-44.
36. Gong Y, Liang X, Dai Y, Huang X, Su Q, Ma Y, et al. Prokinetic effects of *Citrus reticulata* and *Citrus aurantium* extract with/without *Bupleurum chinense* using multistress-induced delayed gastric emptying models. *Pharm Biol.* 2023;61(1):345-55.
37. Yan S, Hao M, Yang H, Sun M, Wu B, Yue Y, et al. Metabolomics study on the therapeutic effect of the Chinese herb pair *Fructus Aurantii Immaturus* and *Rhizoma Atractylodis Macrocephalae* in constipated rats based on UPLC-Q/TOF-MS analysis. *Ann Palliat Med.* 2020;9(5):2837-52.
38. Qiao J, Zhao Y, Liu Y, Zhang S, Zhao W, Liu S, et al. Neuroprotective effect of Ginsenoside Re against neurotoxin-induced Parkinson's disease models via induction of Nrf2. *Mol Med Rep.* 2022;25(6).
39. Choi JH, Jang M, Nah SY, Oh S, Cho IH. Multitarget effects of Korean Red Ginseng in animal model of Parkinson's disease: antiapoptosis, antioxidant, antiinflammation, and maintenance of blood-brain barrier integrity. *J Ginseng Res.* 2018;42(3):379-88.
40. Zhang X, Wang Y, Ma C, Yan Y, Yang Y, Wang X, et al. Ginsenoside Rd and ginsenoside Re offer neuroprotection in a novel model of Parkinson's disease. *Am J Neurodegener Dis.* 2016;5(1):52-61.
41. Liu Y, Zong X, Huang J, Guan Y, Li Y, Du T, et al. Ginsenoside Rb1 regulates prefrontal cortical GABAergic transmission in MPTP-treated mice. *Aging (Albany NY).* 2019;11(14):5008-34.
42. Zhou T, Zu G, Zhang X, Wang X, Li S, Gong X, et al. Neuroprotective effects of ginsenoside Rg1 through the Wnt/ $\beta$ -catenin signaling pathway in both in vivo and in vitro models of Parkinson's disease. *Neuropharmacology.* 2016;101:480-9.
43. Zhou TT, Zu G, Wang X, Zhang XG, Li S, Liang ZH, et al. Immunomodulatory and neuroprotective effects of ginsenoside Rg1 in the MPTP(1-methyl-4-phenyl-1,2,3,6-tetrahydropyridine) -induced mouse model of Parkinson's disease. *Int Immunopharmacol.* 2015;29(2):334-43.
44. Jiang W, Wang Z, Jiang Y, Lu M, Li X. Ginsenoside Rg1 Ameliorates Motor Function in an Animal Model of Parkinson's Disease. *Pharmacology.* 2015;96(1-2):25-31.
45. Heng Y, Zhang QS, Mu Z, Hu JF, Yuan YH, Chen NH. Ginsenoside Rg1 attenuates motor impairment and neuroinflammation in the MPTP-probenecid-induced parkinsonism mouse model by targeting  $\alpha$ -synuclein abnormalities in the substantia nigra. *Toxicol Lett.* 2016;243:7-21.
46. Chen Y, Li YY, Wang S, Zhou T, Chen NH, Yuan YH. Ginsenoside Rg1 Plays a Neuroprotective Role in Regulating the Iron-Regulated Proteins and Against Lipid Peroxidation in Oligodendrocytes. *Neurochem Res.* 2022;47(6):1721-35.
47. Han Y, Wang T, Li C, Wang Z, Zhao Y, He J, et al. Ginsenoside Rg3 exerts a neuroprotective effect in rotenone-induced Parkinson's disease mice via its anti-oxidative properties. *European Journal of Pharmacology.* 2021;909:174413.
48. Van Kampen JM, Baranowski DB, Shaw CA, Kay DG. *Panax ginseng* is neuroprotective in a novel progressive model of Parkinson's disease. *Experimental Gerontology.* 2014;50:95-105.

49. Hu S, Han R, Mak S, Han Y. Protection against 1-methyl-4-phenylpyridinium ion (MPP<sup>+</sup>)-induced apoptosis by water extract of ginseng (*Panax ginseng* C.A. Meyer) in SH-SY5Y cell. *J Ethnopharmacol.* 2011;135(1):34-42.
50. Jun YL, Bae CH, Kim D, Koo S, Kim S. Korean Red Ginseng protects dopaminergic neurons by suppressing the cleavage of p35 to p25 in a Parkinson's disease mouse model. *J Ginseng Res.* 2015;39(2):148-54.
51. Choi JH, Jang M, Oh S, Nah SY, Cho IH. Multi-Target Protective Effects of Gintonin in 1-Methyl-4-phenyl-1,2,3,6-tetrahydropyridine-Mediated Model of Parkinson's Disease via Lysophosphatidic Acid Receptors. *Front Pharmacol.* 2018;9:515.
52. Liu M, Yu S, Wang J, Qiao J, Liu Y, Wang S, et al. Ginseng protein protects against mitochondrial dysfunction and neurodegeneration by inducing mitochondrial unfolded protein response in *Drosophila melanogaster* PINK1 model of Parkinson's disease. *J Ethnopharmacol.* 2020;247:112213.
53. Jeon H, Kim HY, Bae CH, Lee Y, Kim S. Korean Red Ginseng Regulates Intestinal Tight Junction and Inflammation in the Colon of a Parkinson's Disease Mouse Model. *J Med Food.* 2020;23(12):1231-7.
54. Kim D, Kwon S, Jeon H, Ryu S, Ha KT, Kim S. Proteomic change by Korean Red Ginseng in the substantia nigra of a Parkinson's disease mouse model. *J Ginseng Res.* 2018;42(4):429-35.
55. Jeon H, Kim HY, Bae CH, Lee Y, Koo S, Kim S. Korean red ginseng decreases 1-methyl-4-phenylpyridinium-induced mitophagy in SH-SY5Y cell. *J Integr Med.* 2021;19(6):537-44.
56. Ryu S, Jeon H, Koo S, Kim S. Korean Red Ginseng Enhances Neurogenesis in the Subventricular Zone of 1-Methyl-4-Phenyl-1,2,3,6-Tetrahydropyridine-Treated Mice. *Front Aging Neurosci.* 2018;10:355.
57. Wang JY, Yang JY, Wang F, Fu SY, Hou Y, Jiang B, et al. Neuroprotective effect of pseudoginsenoside-f11 on a rat model of Parkinson's disease induced by 6-hydroxydopamine. *Evid Based Complement Alternat Med.* 2013;2013:152798.
58. Chen KZ, Chen S, Ren JY, Lin S, Xiao MJ, Cheng L, et al. [Antidepressant effect of acidic polysaccharides from *Poria* and their regulation of neurotransmitters and NLRP3 pathway]. *Zhongguo Zhong Yao Za Zhi.* 2021;46(19):5088-95.
59. Shah VK, Choi JJ, Han JY, Lee MK, Hong JT, Oh KW. Pachymic Acid Enhances Pentobarbital-Induced Sleeping Behaviors via GABA<sub>A</sub>-ergic Systems in Mice. *Biomol Ther (Seoul).* 2014;22(4):314-20.
60. Pang Y, Zhu S, Pei H. Pachymic acid protects against cerebral ischemia/reperfusion injury by the PI3K/Akt signaling pathway. *Metab Brain Dis.* 2020;35(4):673-80.
61. Kim H, Park I, Park K, Park S, Kim YI, Park BG. The Positive Effects of *Poria cocos* Extract on Quality of Sleep in Insomnia Rat Models. *Int J Environ Res Public Health.* 2022;19(11).
62. Huang YJ, Hsu NY, Lu KH, Lin YE, Lin SH, Lu YS, et al. *Poria cocos* water extract ameliorates the behavioral deficits induced by unpredictable chronic mild stress in rats by down-regulating inflammation. *J Ethnopharmacol.* 2020;258:112566.
63. Gu Y, Wang T, Chen J, Zhou Z, Wang Y, Chen J, et al. The Chinese Herb *Codonopsis pilosula* Isolate Isorhapontigenin protects against oxidative stress injury by inhibiting the activation of PI3K/Akt signaling pathway. *J Integr Neurosci.* 2020;19(2):333-40.
64. Li Q, Cao M, Wei Z, Mei J, Zhang Y, Li M, et al. The protective effect of Buzhong Yiqi decoction on ischemic stroke mice and the mechanism of gut microbiota. *Front Neurosci.* 2022;16:956620.

65. Lim HS, Kim YJ, Sohn E, Yoon J, Kim BY, Jeong SJ. Bojungikgi-Tang, a Traditional Herbal Formula, Exerts Neuroprotective Effects and Ameliorates Memory Impairments in Alzheimer's Disease-Like Experimental Models. *Nutrients*. 2018;10(12).
